# Supplementary material
Source: PubMed Central journal article supplement (PMC8189019)
Supplement: awx169_supplementary_brain-2016-02362-file009.pdf [file awx169_supplementary_brain-2016-02362-file009.pdf]

Supplementary Table 2 – Language specific and domain general regions of interest (ROI) included in this study. Connectome lesion symptom mapping (CLSM) evaluated a network composed of all possible connections between these regions. The ROI# indicate the coding number for each ROI in the JHU Atlas.

| ROI#                     | x     | y     | z     | Volume<br>(cubic cc) | Abbreviated Name   | Name                                                 |
|--------------------------|-------|-------|-------|----------------------|--------------------|------------------------------------------------------|
| <b>Language specific</b> |       |       |       |                      |                    |                                                      |
| 7                        | -35.7 | 18.5  | 37.6  | 26044.0              | MFG_L              | middle frontal gyrus (posterior segment) left        |
| 11                       | -45.4 | 12.9  | 14.7  | 8276.0               | IFG_opercularis_L  | inferior frontal gyrus pars opercularis left         |
| 15                       | -43.4 | 25.7  | 10.0  | 10098.0              | IFG_triangularis_L | inferior frontal gyrus pars triangularis left        |
| 31                       | -41.8 | -52.5 | 38.1  | 21685.0              | AG_L               | angular gyrus left                                   |
| 35                       | -50.9 | -12.4 | -1.3  | 15889.0              | STG_L              | superior temporal gyrus left                         |
| 37                       | -43.8 | 10.6  | -18.9 | 10118.0              | STG_L_pole         | pole of superior temporal gyrus left                 |
| 39                       | -55.8 | -13.5 | -18.2 | 9013.0               | MTG_L              | middle temporal gyrus left                           |
| 184                      | -51.2 | -33.7 | 12.3  | 9410.0               | PSTG_L             | posterior superior temporal gyrus left               |
| 186                      | -53.4 | -43.7 | 2.6   | 15806.0              | PSMG_L             | posterior middle temporal gyrus left                 |
| <b>Domain general</b>    |       |       |       |                      |                    |                                                      |
| 1                        | -13.8 | 13.1  | 51.0  | 27556.0              | SFG_L              | superior frontal gyrus (posterior segment) left      |
| 9                        | -35.5 | 47.3  | 11.9  | 24021.0              | MFG_DPFCL          | middle frontal gyrus (dorsal prefrontal cortex) left |
| 13                       | -41.1 | 33.2  | -5.7  | 8774.0               | IFG_orbitalis_L    | inferior frontal gyrus pars orbitalis left           |
| 25                       | -34.2 | -6.7  | 39.9  | 32640.0              | PrCG_L             | precentral gyrus left                                |
| 27                       | -23.6 | -48.3 | 50.8  | 26402.0              | SPG_L              | Superior parietal gyrus left                         |
| 29                       | -51.6 | -28.7 | 32.8  | 20436.0              | SMG_L              | supramarginal gyrus left                             |
| 41                       | -43.8 | 9.0   | -31.9 | 5996.0               | MTG_L_pole         | pole of middle temporal gyrus left                   |
| 43                       | -44.0 | -9.5  | -31.1 | 11122.0              | ITG_L              | inferior temporal gyrus left                         |
| 69                       | -9.2  | -44.7 | 22.0  | 8528.0               | PCC_L              | posterior cingulate gyrus left                       |
| 71                       | -34.5 | 12.7  | -3.2  | 6345.0               | Ins_L              | insular left                                         |
