# Supplementary material
Source: PubMed Central journal article supplement (PMC8189019)
Supplement: awx169_supplementary_brain-2016-02362-file010.pdf [file awx169_supplementary_brain-2016-02362-file010.pdf]

|    |    |   |            |      |    |    |       |       |       |       |       |       |       |       |       |       |       |       |       |       |       |       |       |       |       |
|----|----|---|------------|------|----|----|-------|-------|-------|-------|-------|-------|-------|-------|-------|-------|-------|-------|-------|-------|-------|-------|-------|-------|-------|
| 52 | 62 | F | No Aphasia | 97.3 |    | 60 | 0.000 | 0.000 | 0.000 | 0.000 | 0.000 | 0.000 | 0.000 | 0.000 | 0.000 | 0.000 | 0.000 | 0.000 | 0.000 | 0.000 | 0.000 | 0.000 | 0.000 | 0.000 | 0.000 |
| 53 | 65 | F | No Aphasia | 98.6 |    | 60 | 0.000 | 0.000 | 0.000 | 0.000 | 0.000 | 0.000 | 0.000 | 0.000 | 0.001 | 0.000 | 0.000 | 0.002 | 0.000 | 0.000 | 0.000 | 0.000 | 0.000 | 0.000 | 0.000 |
| 54 | 63 | M | No Aphasia | 96.9 |    | 59 | 0.140 | 0.041 | 0.014 | 0.023 | 0.000 | 0.000 | 0.000 | 0.000 | 0.001 | 0.667 | 0.020 | 0.000 | 0.261 | 0.435 | 0.001 | 0.000 | 0.168 | 0.000 | 0.000 |
| 55 | 63 | F | No Aphasia | 98.9 |    | 59 | 0.000 | 0.000 | 0.000 | 0.000 | 0.001 | 0.000 | 0.000 | 0.000 | 0.000 | 0.000 | 0.000 | 0.000 | 0.000 | 0.000 | 0.002 | 0.000 | 0.000 | 0.000 | 0.000 |
| 56 | 39 | F | No Aphasia | 96.7 |    | 59 | 0.059 | 0.000 | 0.000 | 0.070 | 0.000 | 0.000 | 0.000 | 0.019 | 0.000 | 0.002 | 0.000 | 0.000 | 0.283 | 0.608 | 0.132 | 0.000 | 0.027 | 0.000 | 0.000 |
| 57 | 51 | F | No Aphasia | 99.6 |    | 60 | 0.000 | 0.000 | 0.000 | 0.000 | 0.000 | 0.000 | 0.000 | 0.000 | 0.000 | 0.000 | 0.000 | 0.000 | 0.000 | 0.000 | 0.000 | 0.000 | 0.000 | 0.000 | 0.000 |
| 58 | 72 | M | No Aphasia | 99.1 |    | 60 | 0.000 | 0.000 | 0.000 | 0.333 | 0.000 | 0.000 | 0.000 | 0.003 | 0.035 | 0.000 | 0.000 | 0.038 | 0.015 | 0.107 | 0.000 | 0.000 | 0.000 | 0.000 | 0.000 |
| 59 | 49 | F | No Aphasia | 96.6 |    | 60 | 0.670 | 0.351 | 0.108 | 0.000 | 0.009 | 0.000 | 0.000 | 0.000 | 0.000 | 0.516 | 0.060 | 0.000 | 0.640 | 0.189 | 0.067 | 0.000 | 0.011 | 0.006 | 0.000 |
| 60 | 59 | M | No Aphasia | 98.4 |    | 60 | 0.000 | 0.000 | 0.000 | 0.000 | 0.000 | 0.000 | 0.000 | 0.000 | 0.000 | 0.000 | 0.000 | 0.000 | 0.000 | 0.000 | 0.000 | 0.000 | 0.000 | 0.000 | 0.000 |
| 61 | 48 | M | No Aphasia | 97.5 | 52 | 60 | 0.000 | 0.000 | 0.000 | 0.000 | 0.000 | 0.000 | 0.000 | 0.000 | 0.000 | 0.000 | 0.000 | 0.000 | 0.000 | 0.000 | 0.000 | 0.000 | 0.000 | 0.000 | 0.000 |
| 62 | 63 | F | No Aphasia | 98.1 | 51 | 60 | 0.002 | 0.000 | 0.000 | 0.608 | 0.000 | 0.000 | 0.000 | 0.000 | 0.000 | 0.024 | 0.000 | 0.000 | 0.064 | 0.568 | 0.066 | 0.000 | 0.002 | 0.000 | 0.000 |
| 63 | 68 | M | No Aphasia | 97   | 49 | 60 | 0.000 | 0.000 | 0.000 | 0.000 | 0.000 | 0.000 | 0.000 | 0.000 | 0.000 | 0.000 | 0.000 | 0.000 | 0.000 | 0.000 | 0.034 | 0.000 | 0.000 | 0.000 | 0.000 |
| 64 | 58 | M | Wernicke   | 31.2 | 50 | 34 | 0.074 | 0.739 | 0.779 | 0.368 | 0.781 | 0.497 | 0.209 | 0.997 | 0.838 | 0.000 | 0.080 | 0.825 | 0.147 | 0.016 | 0.351 | 0.014 | 0.000 | 0.999 | 0.005 |
| 65 | 64 | M | Wernicke   | 46.3 | 49 | 40 | 0.000 | 0.017 | 0.000 | 0.329 | 0.953 | 0.745 | 0.929 | 0.993 | 0.864 | 0.000 | 0.000 | 0.017 | 0.018 | 0.001 | 0.505 | 0.000 | 0.000 | 0.350 | 0.603 |
| 66 | 67 | F | Wernicke   | 47.8 | 43 | 52 | 0.000 | 0.112 | 0.007 | 0.793 | 0.772 | 0.316 | 0.182 | 0.921 | 0.780 | 0.000 | 0.000 | 0.046 | 0.041 | 0.162 | 0.170 | 0.025 | 0.000 | 0.362 | 0.001 |
| 67 | 59 | M | Wernicke   | 57.8 | 44 | 32 | 0.016 | 0.026 | 0.000 | 1.000 | 0.913 | 0.075 | 0.669 | 1.000 | 0.992 | 0.000 | 0.000 | 0.000 | 0.142 | 0.831 | 0.934 | 0.054 | 0.013 | 0.020 | 0.000 |
