# Supplementary material
Source: PubMed Central journal article supplement (PMC8189019)
Supplement: awx169_supplementary_brain-2016-02362-file011.pdf [file awx169_supplementary_brain-2016-02362-file011.pdf]

Supplementary Table 4 – VLSM results for WAB-AQ;  $p < 0.050$  permutation correction:  $z < -4.46$ ,  $z > 3.66$ . These are regions whose lesion was associated with lower WAB-AQ. ROI based results are shown on the left table (A), whereas the centers of the clusters with higher statistical association are shown on the right (B).

| <b>A - Percentage of ROI included in supra-threshold statistical map</b> |                    |      | <b>B - Statistical Clusters</b> |     |     |       |                   |
|--------------------------------------------------------------------------|--------------------|------|---------------------------------|-----|-----|-------|-------------------|
| ROI#                                                                     | Abbreviated Name   | %    | x                               | y   | z   | Max   | Abbreviated Name  |
| 182                                                                      | PIIns_L            | 98.2 | -38                             | -30 | 4   | -7.8  | PSTG_L            |
| 184                                                                      | PSTG_L             | 94.5 | -30                             | -16 | -10 | -4.88 | Fx/ST_L           |
| 35                                                                       | STG_L              | 87.7 | -48                             | -2  | -36 | -4.81 | ITG_L             |
| 186                                                                      | PSMG_L             | 68.2 | -32                             | 6   | -32 | -4.71 | ITG_L             |
| 29                                                                       | SMG_L              | 68   | -34                             | 8   | -30 | -4.71 | MTG_L_pole        |
| 71                                                                       | Ins_L              | 66.9 | -48                             | -12 | -28 | -4.65 | ITG_L             |
| 155                                                                      | SLF_L              | 66   | -60                             | -4  | 22  | -4.65 | PoCG_L            |
| 37                                                                       | STG_L_pole         | 58.6 | -56                             | -40 | -12 | -4.65 | PSMG_L            |
| 31                                                                       | AG_L               | 46.3 | -56                             | -36 | -18 | -4.62 | PSIG_L            |
| 137                                                                      | EC_L               | 38.5 | -42                             | 6   | 22  | -4.61 | IFG_opercularis_L |
| 11                                                                       | IFG_opercularis_L  | 33   | -22                             | -48 | 28  | -4.56 | SPG_L             |
| 39                                                                       | MTG_L              | 32.5 | -34                             | 22  | -24 | -4.54 | LFOG_L            |
| 135                                                                      | RLIC_L             | 31.6 | -52                             | -54 | 48  | -4.52 |                   |
| 151                                                                      | SS_L               | 29.4 | -52                             | -26 | 48  | -4.51 | SMG_L             |
| 157                                                                      | UNC_L              | 27.4 | -52                             | -56 | -4  | -4.51 | IOG_L             |
| 53                                                                       | MOG_L              | 23.1 | -48                             | -32 | -20 | -4.5  | PSIG_L            |
| 147                                                                      | IFO_L              | 16.1 | -66                             | -40 | -4  | -4.49 | PSMG_L            |
| 149                                                                      | PTR_L              | 15.4 | -54                             | -16 | -20 | -4.48 | MTG_L             |
| 15                                                                       | IFG_triangularis_L | 15.1 |                                 |     |     |       |                   |
| 25                                                                       | PrCG_L             | 14.2 |                                 |     |     |       |                   |
| 121                                                                      | PCR_L              | 14.1 |                                 |     |     |       |                   |
| 41                                                                       | MTG_L_pole         | 14   |                                 |     |     |       |                   |
| 23                                                                       | PoCG_L             | 13.9 |                                 |     |     |       |                   |
| 55                                                                       | IOG_L              | 9.7  |                                 |     |     |       |                   |
| 188                                                                      | PSIG_L             | 9.7  |                                 |     |     |       |                   |
| 43                                                                       | ITG_L              | 4.9  |                                 |     |     |       |                   |
| 119                                                                      | SCR_L              | 3    |                                 |     |     |       |                   |
| 13                                                                       | IFG_orbitalis_L    | 2.4  |                                 |     |     |       |                   |
| 117                                                                      | ACR_L              | 1.9  |                                 |     |     |       |                   |
| 17                                                                       | LFOG_L             | 1.6  |                                 |     |     |       |                   |
| 79                                                                       | Put_L              | 0.7  |                                 |     |     |       |                   |
| 143                                                                      | Fx/ST_L            | 0.5  |                                 |     |     |       |                   |
| 7                                                                        | MFG_L              | 0.4  |                                 |     |     |       |                   |
| 49                                                                       | FuG_L              | 0.4  |                                 |     |     |       |                   |
| 27                                                                       | SPG_L              | 0.3  |                                 |     |     |       |                   |
| 81                                                                       | GP_L               | 0.3  |                                 |     |     |       |                   |
| 51                                                                       | SOG_L              | 0.1  |                                 |     |     |       |                   |
