# Supplementary material
Source: PubMed Central journal article supplement (PMC8189019)
Supplement: awx169_supplementary_brain-2016-02362-file012.pdf [file awx169_supplementary_brain-2016-02362-file012.pdf]

Supplementary Table 5 – VLSM results for word recognition;  $p < 0.050$  permutation correction:  $z < -5.26$   $z > 3.19$ . These are regions whose lesion was associated with lower word recognition. ROI based results are shown on the left (A), whereas the centers of the clusters with higher statistical association are shown on the right (B).

| A - Percentage of ROI included in suprathreshold statistical map |                  |      | B - Statistical Clusters |     |     |       |            |
|------------------------------------------------------------------|------------------|------|--------------------------|-----|-----|-------|------------|
| ROI#                                                             | Abbreviated Name | %    | x                        | y   | z   | Max   | Name       |
| 184                                                              | PSTG_L           | 40.9 | -36                      | 20  | -32 | -7.23 | STG_L_pole |
| 151                                                              | SS_L             | 29.2 | -58                      | -16 | -34 | -5.35 | ITG_L      |
| 35                                                               | STG_L            | 25.6 | -42                      | -10 | -32 | -5.28 | ITG_L      |
| 43                                                               | ITG_L            | 15.1 | -58                      | -16 | -28 | -5.6  | ITG_L      |
| 39                                                               | MTG_L            | 14.8 | -34                      | -6  | -28 | -5.51 | FuG_L      |
| 186                                                              | PSMG_L           | 14.3 | -58                      | -8  | -26 | -5.29 | MTG_L      |
| 188                                                              | PSIG_L           | 14   | -40                      | -14 | -24 | -5.28 | ITG_L      |
| 41                                                               | MTG_L_pole       | 13.7 | -34                      | 22  | -24 | -5.89 | LFOG_L     |
| 135                                                              | RLIC_L           | 13.6 | -40                      | 6   | -22 | -5.38 | STG_L_pole |
| 155                                                              | SLF_L            | 13.6 | -42                      | 12  | -22 | -5.54 | STG_L_pole |
| 29                                                               | SMG_L            | 11.2 | -64                      | -18 | -18 | -5.66 | MTG_L      |
| 37                                                               | STG_L_pole       | 9.5  | -30                      | -16 | -10 | -5.98 | Fx/ST_L    |
| 182                                                              | PIns_L           | 7.1  | -52                      | 0   | -10 | -5.28 | STG_L      |
| 31                                                               | AG_L             | 6.4  | -64                      | -40 | -6  | -5.41 | PSMG_L     |
| 157                                                              | UNC_L            | 6.3  | -62                      | -18 | 4   | -5.47 | STG_L      |
| 149                                                              | PTR_L            | 4    | -52                      | -8  | 6   | -5.36 | STG_L      |
| 175                                                              | LV_temporal_L    | 2.4  | -46                      | -70 | 10  | -5.27 | MOG_L      |
| 49                                                               | FuG_L            | 1.5  | -62                      | -42 | 10  | -5.49 | PSMG_L     |
| 137                                                              | EC_L             | 1.1  | -32                      | -58 | 14  | -5.38 | PTR_L      |
| 147                                                              | IFO_L            | 0.9  | -46                      | -14 | 14  | -5.32 | PoCG_L     |
| 75                                                               | Hippo_L          | 0.7  | -56                      | -64 | 16  | -5.27 | PSMG_L     |
| 121                                                              | PCR_L            | 0.5  | -56                      | -52 | 16  | -5.46 | PSMG_L     |
| 143                                                              | Fx/ST_L          | 0.5  | -60                      | -46 | 16  | -5.46 | PSTG_L     |
| 53                                                               | MOG_L            | 0.4  | -58                      | -50 | 18  | -5.46 | PSMG_L     |
| 23                                                               | PoCG_L           | 0.2  | -32                      | -50 | 18  | -5.33 | PTR_L      |
| 17                                                               | LFOG_L           | 0.1  | -48                      | -20 | 20  | -5.26 | SMG_L      |
|                                                                  |                  |      | -38                      | -30 | 32  | -5.47 | SLF_L      |
|                                                                  |                  |      | -46                      | -30 | 30  | -5.27 | SMG_L      |
|                                                                  |                  |      | -42                      | -62 | 34  | -5.64 | MOG_L      |
|                                                                  |                  |      | -46                      | -64 | 34  | -5.26 | MOG_L      |
|                                                                  |                  |      | -40                      | -48 | 34  | -5.35 | AG_L       |
|                                                                  |                  |      | -52                      | -62 | 38  | -5.27 | AG_L       |
|                                                                  |                  |      | -48                      | -62 | 44  | -5.35 | AG_L       |
