# Supplementary material
Source: PubMed Central journal article supplement (PMC8189019)
Supplement: awx169_supplementary_brain-2016-02362-file013.pdf [file awx169_supplementary_brain-2016-02362-file013.pdf]

Supplementary Table 6 – VLSM results for word recognition controlling for object recognition;  $p < 0.050$  permutation correction:  $z < -5.26$   $z > 3.19$ . These are regions whose lesion was associated with lower word recognition. ROI based results are shown on the left (A), whereas the centers of the clusters with higher statistical association are shown on the right (B).

| <b>A - Percentage of ROI included in suprathreshold statistical map</b> |                         |          | <b>B - Statistical Clusters</b> |            |            |              |               |
|-------------------------------------------------------------------------|-------------------------|----------|---------------------------------|------------|------------|--------------|---------------|
| <b>ROI#</b>                                                             | <b>Abbreviated Name</b> | <b>%</b> | <b>-52</b>                      | <b>-30</b> | <b>-24</b> | <b>-5.64</b> | <b>PSIG_L</b> |
| <b>188</b>                                                              | PSIG_L                  | 0.2      | <b>-44</b>                      | -34        | -16        | -4.96        | FuG_L         |
| <b>49</b>                                                               | FuG_L                   | 0.4      | <b>-42</b>                      | -48        | -12        | -5.03        | FuG_L         |
|                                                                         |                         |          | <b>-42</b>                      | -42        | -10        | -4.96        | FuG_L         |
