# Supplementary material
Source: PubMed Central journal article supplement (PMC8189019)
Supplement: awx169_supplementary_brain-2016-02362-file014.pdf [file awx169_supplementary_brain-2016-02362-file014.pdf]

Supplementary Table 7 – CLSM results demonstrating connectome connections whose lower link weight was associated with lower WAB-AQ:  $p < 0.050$  permutation correction:  $z < -3.32$   $z > 2.65$ .

| Abbreviated Name          | - | Abbreviated Name   | Z         |
|---------------------------|---|--------------------|-----------|
| <b>SMG_L</b>              | - | AG_L               | 4.6464825 |
| <b>MTG_L</b>              | - | ITG_L              | 4.6318956 |
| <b>IFG_opercularis_L</b>  | - | IFG_triangularis_L | 4.2923677 |
| <b>AG_L</b>               | - | PSTG_L             | 4.0813001 |
| <b>IFG_opercularis_L</b>  | - | PrCG_L             | 3.8766219 |
| <b>SMG_L</b>              | - | STG_L_pole         | 3.5882854 |
| <b>IFG_orbitalis_L</b>    | - | SMG_L              | 3.5156404 |
| <b>IFG_triangularis_L</b> | - | PrCG_L             | 3.4782262 |
| <b>STG_L</b>              | - | MTG_L              | 3.4698155 |
| <b>AG_L</b>               | - | PSMG_L             | 3.4523296 |
| <b>IFG_orbitalis_L</b>    | - | STG_L              | 3.3940017 |
| <b>IFG_triangularis_L</b> | - | SMG_L              | 3.3450625 |
| <b>SPG_L</b>              | - | AG_L               | 3.3034423 |
| <b>MTG_L</b>              | - | Ins_L              | 3.2892146 |
| <b>PrCG_L</b>             | - | PSMG_L             | 3.2832218 |
| <b>STG_L</b>              | - | Ins_L              | 3.2797326 |
| <b>PSTG_L</b>             | - | PSMG_L             | 3.2565826 |
| <b>SMG_L</b>              | - | PSTG_L             | 3.2317247 |
| <b>PrCG_L</b>             | - | SMG_L              | 3.2057952 |
| <b>MFG_L</b>              | - | STG_L              | 3.1972008 |
| <b>MFG_L</b>              | - | PSTG_L             | 3.1925814 |
| <b>AG_L</b>               | - | Ins_L              | 3.1703591 |
| <b>MFG_L</b>              | - | PrCG_L             | 3.1617874 |
| <b>STG_L</b>              | - | MTG_L_pole         | 3.1472974 |
| <b>AG_L</b>               | - | STG_L              | 3.1425562 |
| <b>STG_L</b>              | - | PSTG_L             | 3.1053553 |
| <b>PrCG_L</b>             | - | AG_L               | 3.0971814 |
| <b>SPG_L</b>              | - | PSMG_L             | 3.096067  |
| <b>MTG_L_pole</b>         | - | Ins_L              | 3.0934667 |
| <b>IFG_triangularis_L</b> | - | STG_L              | 3.0873154 |
| <b>SMG_L</b>              | - | PSMG_L             | 3.0840438 |
| <b>STG_L</b>              | - | PCC_L              | 3.0782582 |
| <b>MFG_DPFC_L</b>         | - | ITG_L              | 3.0525264 |
| <b>IFG_orbitalis_L</b>    | - | MTG_L              | 3.025233  |
| <b>PrCG_L</b>             | - | PSTG_L             | 3.0123265 |
| <b>IFG_opercularis_L</b>  | - | SMG_L              | 2.9745834 |
| <b>IFG_orbitalis_L</b>    | - | Ins_L              | 2.9091392 |
| <b>ITG_L</b>              | - | PCC_L              | 2.90583   |
| <b>SPG_L</b>              | - | STG_L_pole         | 2.8948097 |
| <b>MTG_L</b>              | - | PSTG_L             | 2.8938724 |
| <b>AG_L</b>               | - | MTG_L              | 2.8771839 |
| <b>IFG_opercularis_L</b>  | - | STG_L              | 2.8701333 |
| <b>IFG_opercularis_L</b>  | - | PSMG_L             | 2.8683365 |
| <b>IFG_triangularis_L</b> | - | MTG_L_pole         | 2.8635551 |

|                           |                      |           |
|---------------------------|----------------------|-----------|
| <b>IFG_opercularis_L</b>  | - AG_L               | 2.8633188 |
| <b>MFG_DPFCL</b>          | - SMG_L              | 2.8272221 |
| <b>IFG_triangularis_L</b> | - PSTG_L             | 2.8259555 |
| <b>MTG_L</b>              | - MTG_L_pole         | 2.8049976 |
| <b>IFG_orbitalis_L</b>    | - PrCG_L             | 2.7946231 |
| <b>IFG_orbitalis_L</b>    | - IFG_triangularis_L | 2.7923897 |
| <b>IFG_orbitalis_L</b>    | - MTG_L_pole         | 2.7922496 |
| <b>SMG_L</b>              | - MTG_L_pole         | 2.7852639 |
| <b>AG_L</b>               | - STG_L_pole         | 2.7825037 |
| <b>IFG_triangularis_L</b> | - PSMG_L             | 2.7746625 |
| <b>IFG_opercularis_L</b>  | - PSTG_L             | 2.747244  |
| <b>SMG_L</b>              | - Ins_L              | 2.7460649 |
| <b>MTG_L</b>              | - PSMG_L             | 2.7427156 |
| <b>IFG_orbitalis_L</b>    | - STG_L_pole         | 2.7400783 |
| <b>IFG_orbitalis_L</b>    | - AG_L               | 2.6959237 |
| <b>SFG_L</b>              | - PSMG_L             | 2.6519712 |
| <b>IFG_opercularis_L</b>  | - IFG_orbitalis_L    | 2.6499281 |
