# Supplementary material
Source: PubMed Central journal article supplement (PMC8189019)
Supplement: awx169_supplementary_brain-2016-02362-file015.pdf [file awx169_supplementary_brain-2016-02362-file015.pdf]

Supplementary Table 8

A) CLSM results demonstrating connectome connections whose lower link weight was associated with worse word comprehension not controlling for object recognition (including all 67 subjects):  $p < 0.050$  permutation correction:  $z < -4.08$   $z > 2.32$ .

| Abbreviated Name  | - | Abbreviated Name   | Z         |
|-------------------|---|--------------------|-----------|
| MTG_L             | - | ITG_L              | 3.5474962 |
| MTG_L             | - | PSMG_L             | 3.4956774 |
| SMG_L             | - | AG_L               | 3.3487687 |
| STG_L             | - | MTG_L              | 3.1317986 |
| STG_L             | - | PSMG_L             | 3.0652266 |
| STG_L             | - | PSTG_L             | 3.0040824 |
| STG_L             | - | MTG_L_pole         | 3.0014389 |
| AG_L              | - | PSTG_L             | 2.9534619 |
| IFG_opercularis_L | - | IFG_triangularis_L | 2.9362191 |
| MTG_L             | - | MTG_L_pole         | 2.9324968 |
| PCC_L             | - | PSMG_L             | 2.8613513 |
| ITG_L             | - | PCC_L              | 2.7843061 |
| SPG_L             | - | AG_L               | 2.718577  |
| AG_L              | - | Ins_L              | 2.6911378 |
| Ins_L             | - | PSMG_L             | 2.6672659 |
| SMG_L             | - | STG_L_pole         | 2.6382805 |
| PSTG_L            | - | PSMG_L             | 2.5997474 |
| Ins_L             | - | PSTG_L             | 2.5797576 |
| SPG_L             | - | PSMG_L             | 2.5621636 |
| IFG_orbitalis_L   | - | STG_L              | 2.5404302 |
| SMG_L             | - | PSTG_L             | 2.5202556 |
| IFG_orbitalis_L   | - | PSMG_L             | 2.48724   |
| SPG_L             | - | STG_L_pole         | 2.4803513 |
| IFG_orbitalis_L   | - | SMG_L              | 2.4642917 |
| SPG_L             | - | MTG_L_pole         | 2.4566739 |
| AG_L              | - | PSMG_L             | 2.4551175 |
| STG_L             | - | PCC_L              | 2.4434934 |
| PrCG_L            | - | SMG_L              | 2.4400777 |
| MFG_L             | - | STG_L              | 2.4294722 |
| IFG_orbitalis_L   | - | Ins_L              | 2.4242883 |
| ITG_L             | - | PSMG_L             | 2.3878034 |
| MFG_DPFC_L        | - | ITG_L              | 2.3743903 |
| AG_L              | - | STG_L              | 2.374226  |
| MTG_L             | - | PCC_L              | 2.3651018 |
| MTG_L_pole        | - | Ins_L              | 2.3617879 |
| STG_L             | - | Ins_L              | 2.3491184 |
| MTG_L             | - | PSTG_L             | 2.3318668 |

B) CLSM results demonstrating connectome connections whose lower link weight was associated with worse word comprehension not controlling for object recognition (including only the 43 subjects with PPTT scores) :  $p < 0.050$  permutation correction:  $z < -3.97$   $z > 2.28$ ).

| <b>Abbreviated Name</b> | <b>- Abbreviated Name</b> | <b>Z</b>  |
|-------------------------|---------------------------|-----------|
| IFG_opercularis_L       | - IFG_triangularis_L      | 2.3792803 |
| SPG_L                   | - AG_L                    | 2.6043783 |
| SMG_L                   | - AG_L                    | 2.7482874 |
| IFG_orbitalis_L         | - STG_L                   | 2.2985462 |
| AG_L                    | - STG_L                   | 2.5071268 |
| SPG_L                   | - STG_L_pole              | 2.4097594 |
| SMG_L                   | - STG_L_pole              | 3.0014389 |
| STG_L                   | - MTG_L                   | 2.3557768 |
| STG_L                   | - MTG_L_pole              | 2.4002958 |
| ITG_L                   | PCC_L                     | 2.3140268 |
| MTG_L_pole              | Ins_L                     | 2.3156931 |
| AG_L                    | PSTG_L                    | 2.3958431 |
| STG_L                   | PSTG_L                    | 2.7652971 |
| SPG_L                   | PSMG_L                    | 2.6302359 |
| STG_L                   | PSMG_L                    | 2.4506500 |
| MTG_L                   | PSMG_L                    | 2.6110752 |
| PCC_L                   | PSMG_L                    | 3.1478960 |
| Ins_L                   | PSMG_L                    | 2.3456577 |
| PSTG_L                  | PSMG_L                    | 2.3352281 |
