# Supplementary material
Source: PubMed Central journal article supplement (PMC8189019)
Supplement: awx169_supplementary_brain-2016-02362-file016.pdf [file awx169_supplementary_brain-2016-02362-file016.pdf]

Supplementary Table 9 – CLSM results demonstrating connectome connections whose lower link weight was associated with lower word recognition controlling for object recognition:  $p < 0.050$  permutation correction:  $z < -3.52$   $z > 2.75$ .

| <b>Abbreviated Name</b> | <b>-</b> | <b>Abbreviated Name</b> | <b>Z</b>  |
|-------------------------|----------|-------------------------|-----------|
| ITG_L                   | -        | PSMG_L                  | 2.8139382 |
| MTG_L                   | -        | PSMG_L                  | 2.7726191 |
| PCC_L                   | -        | PSMG_L                  | 2.7346334 |
| ITG_L                   | -        | PCC_L                   | 2.4481436 |
