# Supplementary material
Source: PubMed Central journal article supplement (PMC8189019)
Supplement: awx169_supplementary_brain-2016-02362-file018.pdf [file awx169_supplementary_brain-2016-02362-file018.pdf]

Supplementary Table 11 – Similarly, using Neurosynth, the following MRI studies were associated with word recognition and the pooled statistical map is shown in Figure 4.

| #  | Title                                                                                                                                                   | Authors                                                                                                  | Journal                                                                            |
|----|---------------------------------------------------------------------------------------------------------------------------------------------------------|----------------------------------------------------------------------------------------------------------|------------------------------------------------------------------------------------|
| 1  | The cingulo-opercular network provides word-recognition benefit.                                                                                        | Vaden KI Jr, Kuchinsky SE, Cute SL, Ahlstrom JB, Dubno JR, Eckert MA                                     | The Journal of neuroscience : the official journal of the Society for Neuroscience |
| 2  | Speech recognition in younger and older adults: a dependency on low-level auditory cortex.                                                              | Harris KC, Dubno JR, Keren NI, Ahlstrom JB, Eckert MA                                                    | The Journal of neuroscience : the official journal of the Society for Neuroscience |
| 3  | Inhibition and facilitation in visual word recognition: prefrontal contribution to the orthographic neighborhood size effect.                           | Fiebach CJ, Ricker B, Friederici AD, Jacobs AM                                                           | NeuroImage                                                                         |
| 4  | Combining functional neuroimaging with off-line brain stimulation: modulation of task-related activity in language areas.                               | Andoh J, Paus T                                                                                          | Journal of cognitive neuroscience                                                  |
| 5  | Top-down modulation of ventral occipito-temporal responses during visual word recognition.                                                              | Twomey T, Kawabata Duncan KJ, Price CJ, Devlin JT                                                        | NeuroImage                                                                         |
| 6  | This is your brain on Scrabble: Neural correlates of visual word recognition in competitive Scrabble players as measured during task and resting-state. | Protzner AB, Hargreaves IS, Campbell JA, Myers-Stewart K, van Hees S, Goodyear BG, Sargious P, Pexman PM | Cortex; a journal devoted to the study of the nervous system and behavior          |
| 7  | Cognitive processing in Chinese literate and illiterate subjects: an fMRI study.                                                                        | Li G, Cheung RT, Gao JH, Lee TM, Tan LH, Fox PT, Jack CR Jr, Yang ES                                     | Human brain mapping                                                                |
| 8  | The interaction of lexical semantics and cohort competition in spoken word recognition: an fMRI study.                                                  | Zhuang J, Randall B, Stamatakis EA, Marslen-Wilson WD, Tyler LK                                          | Journal of cognitive neuroscience                                                  |
| 9  | Activation of the left inferior frontal gyrus in the first 200 ms of reading: evidence from magnetoencephalography (MEG).                               | Cornelissen PL, Kringelbach ML, Ellis AW, Whitney C, Holliday IE, Hansen PC                              | PloS one                                                                           |
| 10 | Task modulation of brain responses in visual word recognition as studied using EEG/MEG and fMRI.                                                        | Chen Y, Davis MH, Pulvermuller F, Hauk O                                                                 | Frontiers in human neuroscience                                                    |
| 11 | Effective connectivity of brain regions related to visual word recognition: An fMRI study of Chinese reading.                                           | Xu M, Wang T, Chen S, Fox PT, Tan LH                                                                     | Human brain mapping                                                                |
| 12 | Implicit phonological priming during visual word recognition.                                                                                           | Wilson LB, Tregellas JR, Slason E, Pasko BE, Rojas DC                                                    | NeuroImage                                                                         |
| 13 | Language lateralization and the role of the fusiform gyrus in semantic processing in young children.                                                    | Balsamo LM, Xu B, Gaillard WD                                                                            | NeuroImage                                                                         |
| 14 | Neural correlates of morphological decomposition in a morphologically rich language: an fMRI study.                                                     | Lehtonen M, Vorobyev VA, Hugdahl K, Tuokkola T, Laine M                                                  | Brain and language                                                                 |
| 15 | Unconsciously deciphering handwriting: subliminal invariance for handwritten words in the visual word form area.                                        | Qiao E, Vinckier F, Szwed M, Naccache L, Valabregue R, Dehaene S, Cohen L                                | NeuroImage                                                                         |
| 16 | Effective connectivity of the left BA 44, BA 45, and inferior temporal gyrus during lexical and phonological decisions identified with DCM.             | Heim S, Eickhoff SB, Ischebeck AK, Friederici AD, Stephan KE, Amunts K                                   | Human brain mapping                                                                |
| 17 | Reading normal and degraded words: contribution of the dorsal and ventral visual pathways.                                                              | Cohen L, Dehaene S, Vinckier F, Jobert A, Montavont A                                                    | NeuroImage                                                                         |
| 18 | The role of the ventral and dorsal pathways in reading Chinese characters and English words.                                                            | Sun Y, Yang Y, Desroches AS, Liu L, Peng D                                                               | Brain and language                                                                 |
| 19 | Probabilistic orthographic cues to grammatical category in the brain.                                                                                   | Arciuli J, McMahon K, Zubicaray Gd                                                                       | Brain and language                                                                 |
| 20 | Investigating unique environmental contributions to the neural representation of written words: a monozygotic twin study.                               | Park J, Park DC, Polk TA                                                                                 | PloS one                                                                           |
| 21 | Right prefrontal cortex and episodic memory retrieval: a functional MRI test of the monitoring hypothesis.                                              | Henson RN, Shallice T, Dolan RJ                                                                          | Brain : a journal of neurology                                                     |
| 22 | Visual processing of words in a patient with visual form agnosia: A behavioural and fMRI study.                                                         | Cavina-Pratesi C, Large ME, Milner AD                                                                    | Cortex; a journal devoted to the study of                                          |

|    |                                                                                                                                                                                     |                                                                                              |                                                                                 |
|----|-------------------------------------------------------------------------------------------------------------------------------------------------------------------------------------|----------------------------------------------------------------------------------------------|---------------------------------------------------------------------------------|
|    |                                                                                                                                                                                     |                                                                                              | the nervous system and behavior                                                 |
| 23 | Opaque for the reader but transparent for the brain: neural signatures of morphological complexity.                                                                                 | Meinzer M, Lahiri A, Flaisch T, Hannemann R, Eulitz C                                        | Neuropsychologia                                                                |
| 24 | Individual differences in skilled adult readers reveal dissociable patterns of neural activity associated with component processes of reading.                                      | Welcome SE, Joanisse MF                                                                      | Brain and language                                                              |
| 25 | Developmental differences for word processing in the ventral stream.                                                                                                                | Olulade OA, Flowers DL, Napoliello EM, Eden GF                                               | Brain and language                                                              |
| 26 | Distributed cortical networks for syntax processing: Broca's area as the common denominator.                                                                                        | Heim S, Opitz B, Friederici AD                                                               | Brain and language                                                              |
| 27 | The visual word form area and the frequency with which words are encountered: evidence from a parametric fMRI study.                                                                | Kronbichler M, Hutzler F, Wimmer H, Mair A, Staffen W, Ladurner G                            | NeuroImage                                                                      |
| 28 | Neural circuitry of the bilingual mental lexicon: effect of age of second language acquisition.                                                                                     | Isel F, Baumgaertner A, Thran J, Meisel JM, Buchel C                                         | Brain and cognition                                                             |
| 29 | Neural correlates of semantic priming for ambiguous words: an event-related fMRI study.                                                                                             | Copland DA, de Zubicaray GI, McMahon K, Eastburn M                                           | Brain research                                                                  |
| 30 | Hierarchical coding of letter strings in the ventral stream: dissecting the inner organization of the visual word-form system.                                                      | Vinckier F, Dehaene S, Jobert A, Dubus JP, Sigman M, Cohen L                                 | Neuron                                                                          |
| 31 | Fixation-Related fMRI Analysis in the Domain of Reading Research: Using Self-Paced Eye Movements as Markers for Hemodynamic Brain Responses During Visual Letter String Processing. | Richlan F, Gagl B, Hawelka S, Braun M, Schurz M, Kronbichler M, Hutzler F                    | Cerebral cortex (New York, N.Y. : 1991)                                         |
| 32 | Processing concrete words: fMRI evidence against a specific right-hemisphere involvement.                                                                                           | Fiebach CJ, Friederici AD                                                                    | Neuropsychologia                                                                |
| 33 | Neural control of cross-language asymmetry in the bilingual brain.                                                                                                                  | Nakamura K, Kouider S, Makuuchi M, Kuroki C, Hanajima R, Ugawa Y, Ogawa S                    | Cerebral cortex (New York, N.Y. : 1991)                                         |
| 34 | The impact of iconic gestures on foreign language word learning and its neural substrate.                                                                                           | Macedonia M, Muller K, Friederici AD                                                         | Human brain mapping                                                             |
| 35 | Phoneme and word recognition in the auditory ventral stream.                                                                                                                        | DeWitt I, Rauschecker JP                                                                     | Proceedings of the National Academy of Sciences of the United States of America |
| 36 | Elaborative verbal encoding and altered anterior parahippocampal activation in adolescents and young adults at genetic risk for schizophrenia using FMRI.                           | Thermenos HW, Seidman LJ, Poldrack RA, Peace NK, Koch JK, Faraone SV, Tsuang MT              | Biological psychiatry                                                           |
| 37 | The orthographic sensitivity to written Chinese in the occipital-temporal cortex.                                                                                                   | Liu H, Jiang Y, Zhang B, Ma L, He S, Weng X                                                  | Experimental brain research                                                     |
| 38 | The Visual Word Form Area: evidence from an fMRI study of implicit processing of Chinese characters.                                                                                | Liu C, Zhang WT, Tang YY, Mai XQ, Chen HC, Tardif T, Luo YJ                                  | NeuroImage                                                                      |
| 39 | Cognitive levels of performance account for hemispheric lateralisation effects in dyslexic and normally reading children.                                                           | Heim S, Grande M, Meffert E, Eickhoff SB, Schreiber H, Kukulja J, Shah NJ, Huber W, Amunts K | NeuroImage                                                                      |
| 40 | Role of the superior parietal lobules in letter-identity processing within strings: FMRI evidence from skilled and dyslexic readers.                                                | Reilhac C, Peyrin C, Demonet JF, Valdois S                                                   | Neuropsychologia                                                                |
| 41 | Attention-related activity during episodic memory retrieval: a cross-function fMRI study.                                                                                           | Cabeza R, Dolcos F, Prince SE, Rice HJ, Weissman DH, Nyberg L                                | Neuropsychologia                                                                |
| 42 | Distinct brain representations for early and late learned words.                                                                                                                    | Fiebach CJ, Friederici AD, Muller K, von Cramon DY, Hernandez AE                             | NeuroImage                                                                      |
| 43 | Combined ERP/fMRI evidence for early word recognition effects in the posterior inferior temporal gyrus.                                                                             | Dien J, Brian ES, Molfese DL, Gold BT                                                        | Cortex; a journal devoted to the study of the nervous system and behavior       |
| 44 | Age-related neural reorganization during spoken word recognition: the interaction of form and meaning.                                                                              | Shafto M, Randall B, Stamatakis EA, Wright P, Tyler LK                                       | Journal of cognitive neuroscience                                               |
| 45 | Modulation of brain activity by multiple lexical and word form variables in visual word recognition: A parametric fMRI study.                                                       | Hauk O, Davis MH, Pulvermuller F                                                             | NeuroImage                                                                      |

|    |                                                                                                                                 |                                                                                     |                                                                                    |
|----|---------------------------------------------------------------------------------------------------------------------------------|-------------------------------------------------------------------------------------|------------------------------------------------------------------------------------|
| 46 | Task by stimulus interactions in brain responses during Chinese character processing.                                           | Yang J, Wang X, Shu H, Zevin JD                                                     | NeuroImage                                                                         |
| 47 | Modeling activation and effective connectivity of VWFA in same script bilinguals.                                               | Boukrina O, Hanson SJ, Hanson C                                                     | Human brain mapping                                                                |
| 48 | Neural correlates of the orthographic neighborhood size effect in Chinese.                                                      | Li QL, Bi HY, Zhang JX                                                              | The European journal of neuroscience                                               |
| 49 | Reinstatement of encoding context during recollection: behavioural and neuroimaging evidence of a double dissociation.          | Skinner EI, Manios M, Fugelsang J, Fernandes MA                                     | Behavioural brain research                                                         |
| 50 | Evidence for Cerebellar Contributions to Adaptive Plasticity in Speech Perception.                                              | Guediche S, Holt LL, Laurent P, Lim SJ, Fiez JA                                     | Cerebral cortex (New York, N.Y. : 1991)                                            |
| 51 | The effects of age on the neural correlates of episodic encoding.                                                               | Grady CL, McIntosh AR, Rajah MN, Beig S, Craik FI                                   | Cerebral cortex (New York, N.Y. : 1991)                                            |
| 52 | Selective response to letter categorization within the left fusiform gyrus.                                                     | Pernet C, Celsis P, Demonet JF                                                      | NeuroImage                                                                         |
| 53 | Dissociating the cortical basis of memory for voices, words and tones.                                                          | Stevens AA                                                                          | Brain research. Cognitive brain research                                           |
| 54 | Pre-orthographic character string processing and parietal cortex: a role for visual attention in reading?                       | Lobier M, Peyrin C, Le Bas JF, Valdois S                                            | Neuropsychologia                                                                   |
| 55 | A cross-linguistic evaluation of script-specific effects on fMRI lateralization in late second language readers.                | Koyama MS, Stein JF, Stoodley CJ, Hansen PC                                         | Frontiers in human neuroscience                                                    |
| 56 | An event-related fMRI investigation of phonological-lexical competition.                                                        | Prabhakaran R, Blumstein SE, Myers EB, Hutchison E, Britton B                       | Neuropsychologia                                                                   |
| 57 | Decoding letter position in word reading.                                                                                       | Ossmy O, Ben-Shachar M, Mukamel R                                                   | Cortex; a journal devoted to the study of the nervous system and behavior          |
| 58 | Neuroanatomically separable effects of imageability and grammatical class during single-word comprehension.                     | Bedny M, Thompson-Schill SL                                                         | Brain and language                                                                 |
| 59 | Optimally efficient neural systems for processing spoken language.                                                              | Zhuang J, Tyler LK, Randall B, Stamatakis EA, Marslen-Wilson WD                     | Cerebral cortex (New York, N.Y. : 1991)                                            |
| 60 | An fMRI examination of the effects of acoustic-phonetic and lexical competition on access to the lexical-semantic network.      | Minicucci D, Guediche S, Blumstein SE                                               | Neuropsychologia                                                                   |
| 61 | Emotional valence and arousal affect reading in an interactive way: neuroimaging evidence for an approach-withdrawal framework. | Citron FM, Gray MA, Critchley HD, Weekes BS, Ferstl EC                              | Neuropsychologia                                                                   |
| 62 | Human striatal activation during adjustment of the response criterion in visual word recognition.                               | Kuchinke L, Hofmann MJ, Jacobs AM, Fruhholz S, Tamm S, Herrmann M                   | NeuroImage                                                                         |
| 63 | A dual-route perspective on poor reading in a regular orthography: an fMRI study.                                               | Wimmer H, Schurz M, Sturm D, Richlan F, Klackl J, Kronbichler M, Ladurner G         | Cortex; a journal devoted to the study of the nervous system and behavior          |
| 64 | Sensitivity to orthographic familiarity in the occipito-temporal region.                                                        | Bruno JL, Zumberge A, Manis FR, Lu ZL, Goldman JG                                   | NeuroImage                                                                         |
| 65 | Visual processing of multiple elements in the dyslexic brain: evidence for a superior parietal dysfunction.                     | Lobier MA, Peyrin C, Pichat C, Le Bas JF, Valdois S                                 | Frontiers in human neuroscience                                                    |
| 66 | A surface-based analysis of language lateralization and cortical asymmetry.                                                     | Greve DN, Van der Haegen L, Cai Q, Stufflebeam S, Sabuncu MR, Fischl B, Brysbaert M | Journal of cognitive neuroscience                                                  |
| 67 | Repetition suppression and semantic enhancement: an investigation of the neural correlates of priming.                          | Raposo A, Moss HE, Stamatakis EA, Tyler LK                                          | Neuropsychologia                                                                   |
| 68 | Syllable congruency and word frequency effects on brain activation.                                                             | Carreiras M, Riba J, Vergara M, Heldmann M, Munte TF                                | Human brain mapping                                                                |
| 69 | Recollection and familiarity in recognition memory: an event-related functional magnetic resonance imaging study.               | Henson RN, Rugg MD, Shallice T, Josephs O, Dolan RJ                                 | The Journal of neuroscience : the official journal of the Society for Neuroscience |
| 70 | Recognition memory for Braille or spoken words: an fMRI study in early blind.                                                   | Burton H, Sinclair RJ, Agato A                                                      | Brain research                                                                     |
| 71 | Comparison of the neural correlates of retrieval success                                                                        | Okada K, Vilberg KL, Rugg MD                                                        | Human brain mapping                                                                |

| in tests of cued recall and recognition memory. |                                                                                                            |                                                                                                                                                                       |
|-------------------------------------------------|------------------------------------------------------------------------------------------------------------|-----------------------------------------------------------------------------------------------------------------------------------------------------------------------|
| 72                                              | Prion protein M129V polymorphism affects retrieval-related brain activity.                                 | Buchmann A, Mondadori CR, Hanggi J, Aerni A, Vrticka P, Luechinger R, Boesiger P, Hock C, Nitsch RM, de Quervain DJ, Papassotiropoulos A, Henke K<br>Neuropsychologia |
| 73                                              | Hierarchical coding of characters in the ventral and dorsal visual streams of Chinese language processing. | Chan ST, Tang SW, Tang KW, Lee WK, Lo SS, Kwong KK<br>NeuroImage                                                                                                      |
| 74                                              | A test of the role of the medial temporal lobe in single-word decoding.                                    | Osipowicz K, Rickards T, Shah A, Sharan A, Sperling M, Kahn W, Tracy J<br>NeuroImage                                                                                  |
