# Supplementary material
Source: PubMed Central journal article supplement (PMC8189019)

Medial View

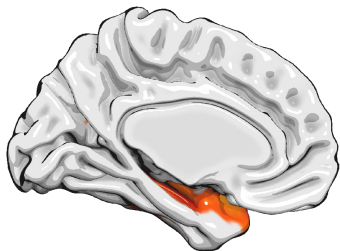

Lateral View

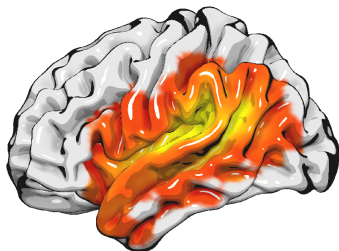

Inferior View

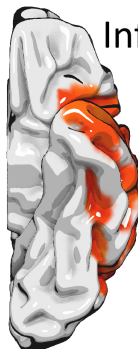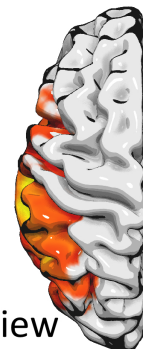

Superior View

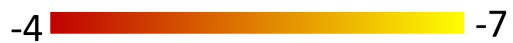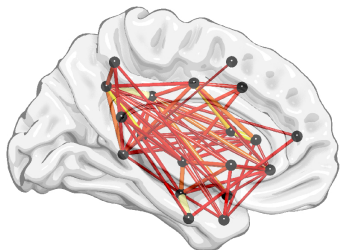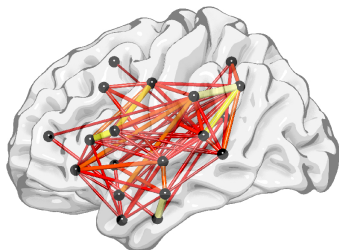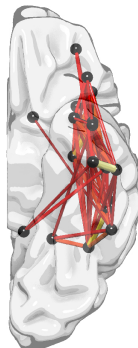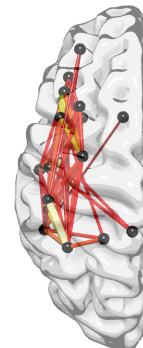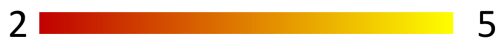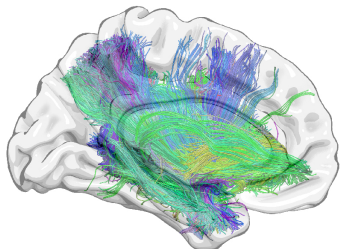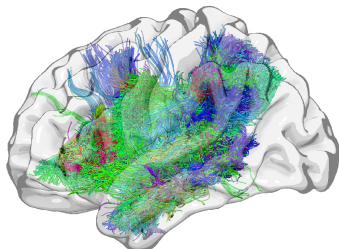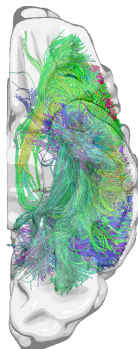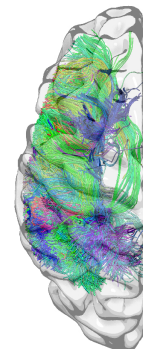

Supplement: awx169_supplementary_brain-2016-02362-file004.pdf [file awx169_supplementary_brain-2016-02362-file004.pdf]
